# Supplementary material
Source: PubMed Central journal article supplement (PMC1895982)

1 Hz

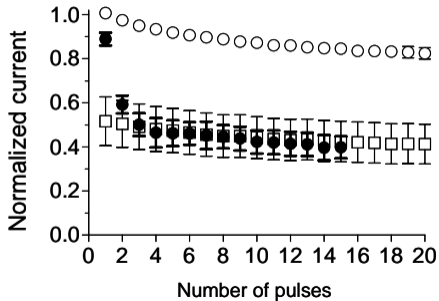

10 Hz

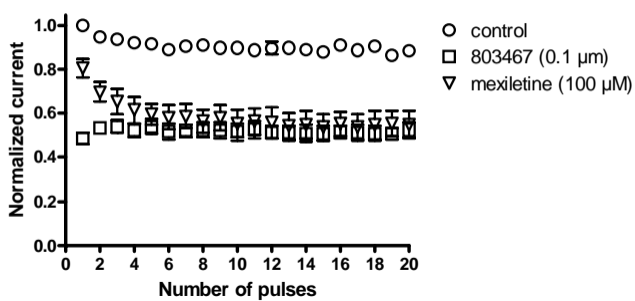

Supplement: pnas_0611364104_1.pdf [file pnas_0611364104_1.pdf]
